# Supplementary material
Source: publisher figshare collection journal article supplement (https://frontiersin.figshare.com/ndownloader/files/34078778)
Supplement: Supplementary file [file 34078778]

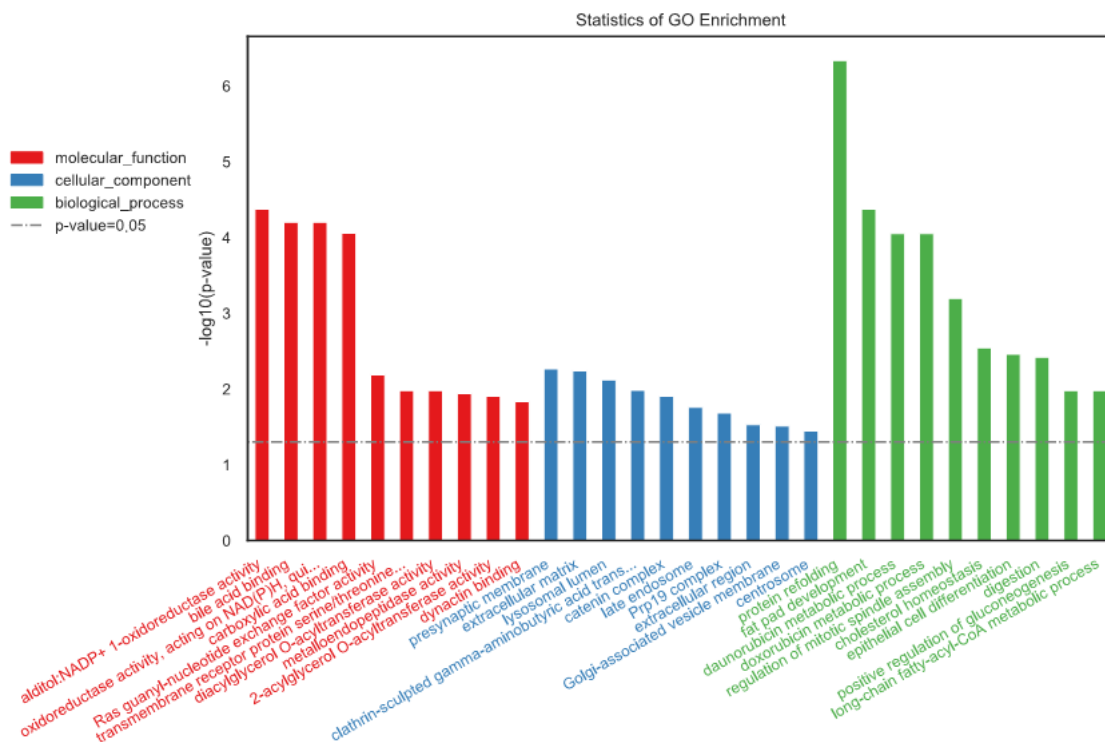

**Supplementary Figure 1. Gene Ontology (GO) gene functional classification of the intersectional DEGs.**

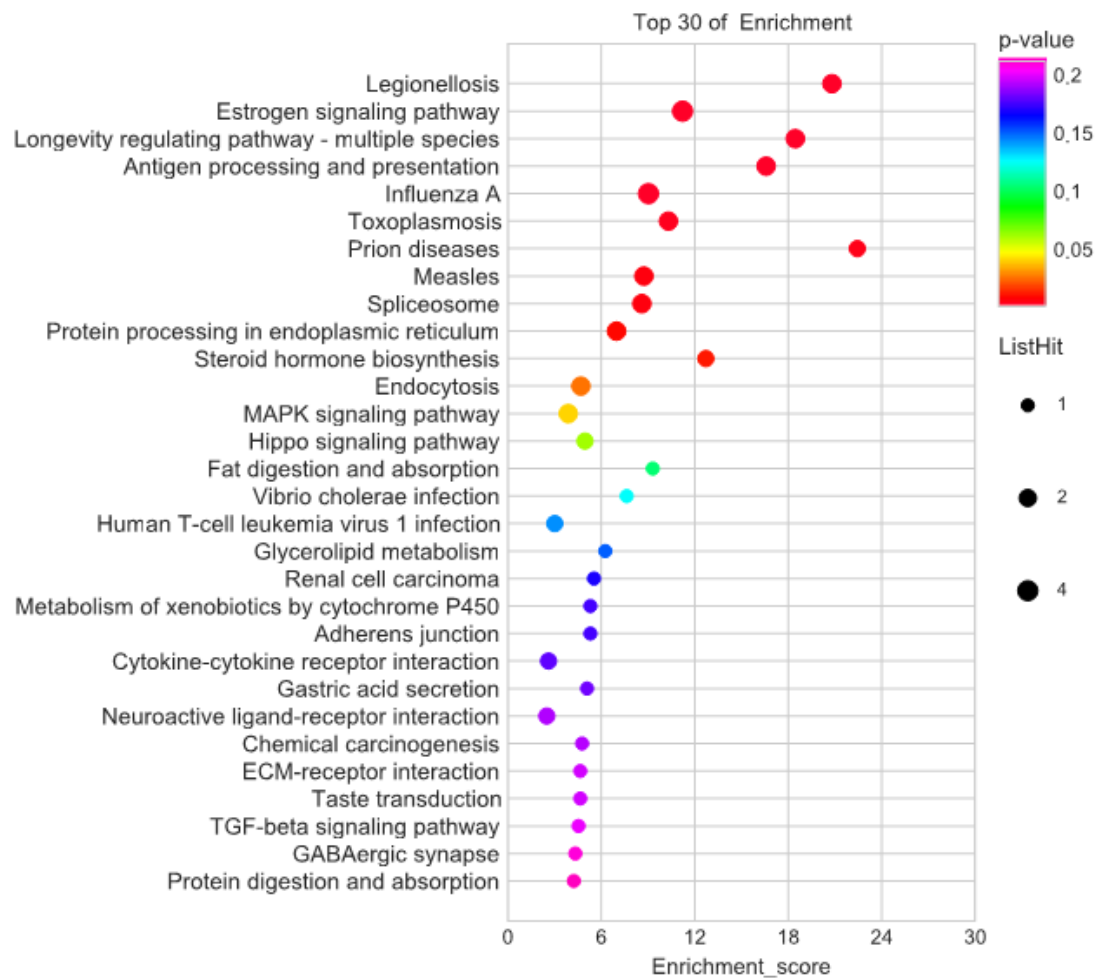

**Supplementary Figure 2. Kyoto Encyclopedia of Genes and Genomes (KEGG) analysis of the intersectional DEGs.**
